# Supplementary material for: ADHD-associated dopamine transporter, latrophilin and neurofibromin share a dopamine-related locomotor signature in Drosophila
Source: PubMed Central journal article supplement — Mol Psychiatry. 2015 May 12;21(4):565–73. doi: 10.1038/mp.2015.55 (PMC4804182; doi:10.1038/mp.2015.55), 2015-05-12

## Supplementary Figure 2

Sodium-dependent transporter, transporter solute carrier family 6 member (ENSMF00730001521312)

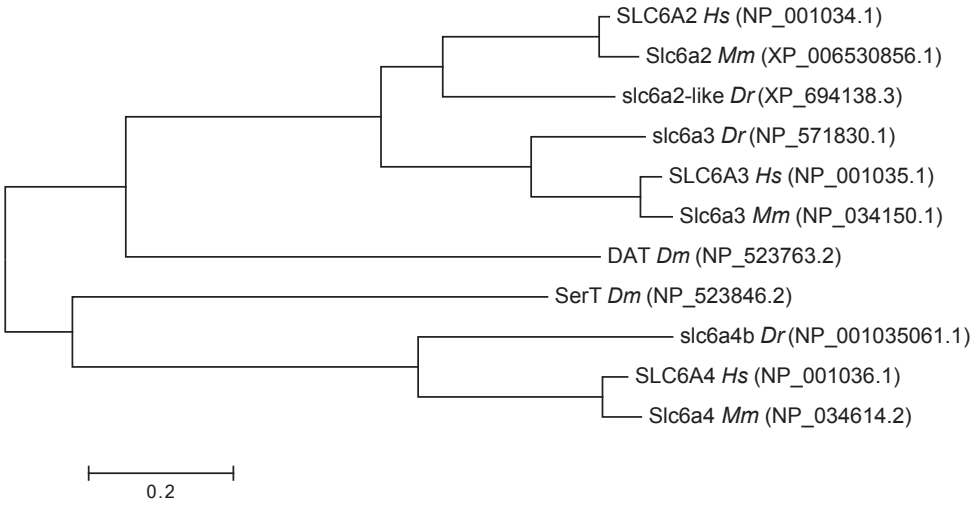

Latrophilin precursor calcium-independent alpha latrotoxin receptor Cirl (ENSMF00260000050328)

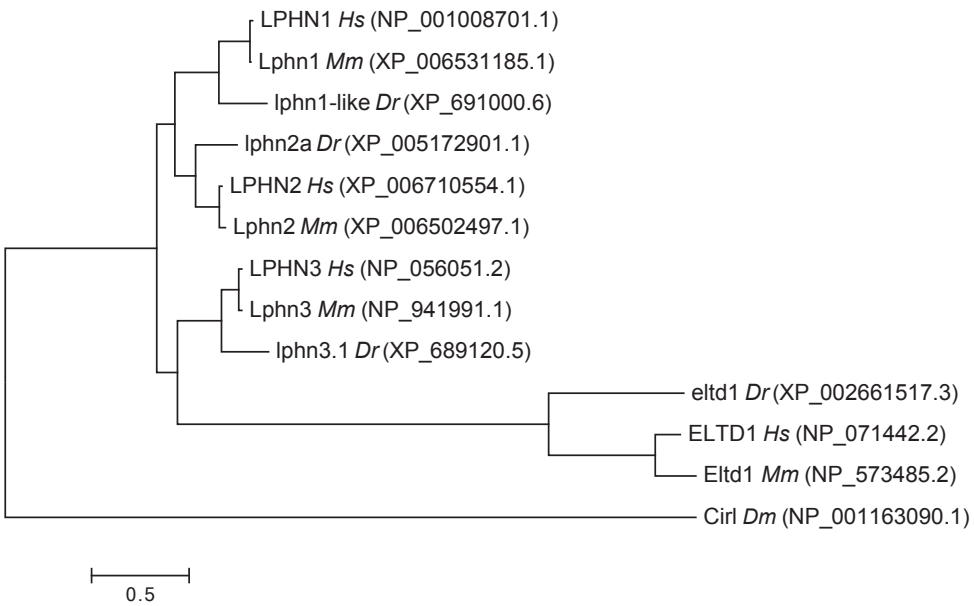

Neurofibromin Neurofibromatosis-related NF1 (ENSMF00250000001252)

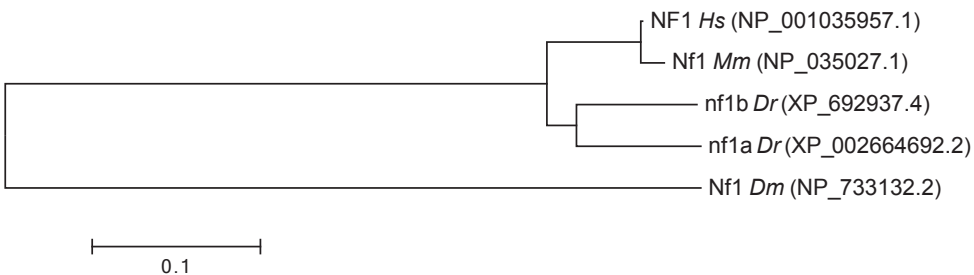

Supplement: mp201555x4.pdf [file mp201555x4.pdf]
