# Supplementary material for: ADHD-associated dopamine transporter, latrophilin and neurofibromin share a dopamine-related locomotor signature in Drosophila
Source: PubMed Central journal article supplement — Mol Psychiatry. 2015 May 12;21(4):565–73. doi: 10.1038/mp.2015.55 (PMC4804182; doi:10.1038/mp.2015.55), 2015-05-12
Supplement: mp201555x5.pdf [file mp201555x5.pdf]

**Supplementary Table 1. Random control set**

| <b>FlyBase ID</b> | <b><i>Drosophila</i><br/>gene symbol</b> | <b>RNAi stock</b> | <b>Human<br/>Entrez ID</b> | <b>Human gene<br/>symbol</b> |
|-------------------|------------------------------------------|-------------------|----------------------------|------------------------------|
| FBgn0263998       | <i>Ack-like</i>                          | v100169           | 7535                       | <i>ZAP70</i>                 |
| FBgn0000117       | <i>arm</i>                               | v107344           | 1499                       | <i>CTNNB1</i>                |
| FBgn0000150       | <i>awd</i>                               | v110782           | 4830                       | <i>NME1</i>                  |
| FBgn0027843       | <i>CAH2</i>                              | v108184           | 771                        | <i>CA12</i>                  |
| FBgn0033392       | <i>CG8027</i>                            | v109400           | 79158                      | <i>GNPTAB</i>                |
| FBgn0034566       | <i>CG9313</i>                            | v106167           | 27019                      | <i>DNAI1</i>                 |
| FBgn0037798       | <i>CG12817</i>                           | v106952           | 90411                      | <i>MCFD2</i>                 |
| FBgn0051999       | <i>CG31999</i>                           | v106122           | 10516                      | <i>FBLN5</i>                 |
| FBgn0023531       | <i>CG32809</i>                           | v104480           | 56243                      | <i>KIAA1217</i>              |
| FBgn0035589       | <i>CHMP2B</i>                            | v108600           | 25978                      | <i>CHMP2B</i>                |
| FBgn0026441       | <i>ear</i>                               | v109659           | 4300                       | <i>MLLT3</i>                 |
| FBgn0031117       | <i>GstT3</i>                             | v110018           | 2952                       | <i>GSTT1</i>                 |
| FBgn0263133       | <i>ico</i>                               | v107709           | 85476                      | <i>GFM1</i>                  |
| FBgn0063485       | <i>Laspl</i>                             | v109416           | 4703                       | <i>NEB</i>                   |
| FBgn0019686       | <i>lok</i>                               | v110342           | 11200                      | <i>CHEK2</i>                 |
| FBgn0028997       | <i>nmdyn-D7</i>                          | v105161           | 29922                      | <i>NME7</i>                  |
| FBgn0011660       | <i>Pms2</i>                              | v108638           | 5395                       | <i>PMS2</i>                  |
| FBgn0022768       | <i>Pp2C1</i>                             | v105249           | 8493                       | <i>PPM1D</i>                 |
| FBgn0025615       | <i>Torsin</i>                            | v110073           | 1861                       | <i>TOR1A</i>                 |
