# Supplementary material for: ADHD-associated dopamine transporter, latrophilin and neurofibromin share a dopamine-related locomotor signature in Drosophila
Source: PubMed Central journal article supplement — Mol Psychiatry. 2015 May 12;21(4):565–73. doi: 10.1038/mp.2015.55 (PMC4804182; doi:10.1038/mp.2015.55), 2015-05-12
Supplement: mp201555x6.pdf [file mp201555x6.pdf]

**Supplementary Table 2. ADHD candidate genes**

| <b>ID</b> | <b>Name</b>       | <b>Publication reporting p &lt;0.0001</b>                              |
|-----------|-------------------|------------------------------------------------------------------------|
| 6532      | <i>5-HTT</i>      | Gizer et al. 2009                                                      |
| 387129    | <i>AC005493.1</i> | IMAGEII Consortium Group 2010                                          |
| 170691    | <i>ADAMTS17</i>   | IMAGEII Consortium Group 2010                                          |
| N/A       | <i>AL024506.1</i> | Mick et al. 2010                                                       |
| 23245     | <i>ASTN2</i>      | Lesch et al. 2008                                                      |
| 23250     | <i>ATP11A</i>     | IMAGEII Consortium Group 2010                                          |
| 9914      | <i>ATP2C2</i>     | Lesch et al. 2008                                                      |
| 9296      | <i>ATP6V1F</i>    | IMAGEII Consortium Group 2010                                          |
| 658       | <i>BMPR1B</i>     | Mick et al. 2010                                                       |
| 80217     | <i>C10orf79</i>   | Lesch et al. 2008                                                      |
| 127254    | <i>C1orf173</i>   | IMAGEII Consortium Group 2010                                          |
| 388815    | <i>C21orf34</i>   | Mick et al. 2010                                                       |
| 158067    | <i>C9orf98</i>    | Lesch et al. 2008                                                      |
| 64753     | <i>CCDC136</i>    | IMAGEII Consortium Group 2010                                          |
| 201134    | <i>CCDC46</i>     | Mick et al. 2010                                                       |
| 1012      | <i>CDH13</i>      | Lasky-Su et al. 2008, Lesch et al. 2008, IMAGEII Consortium Group 2010 |
| 64072     | <i>CDH23</i>      | Lesch et al. 2008                                                      |
| 129684    | <i>CNTNAP5</i>    | IMAGEII Consortium Group 2010                                          |
| 9586      | <i>CREB5</i>      | Lesch et al. 2008                                                      |
| 1420      | <i>CRYGC</i>      | Lesch et al. 2008                                                      |
| 114784    | <i>CSMD2</i>      | Lesch et al. 2008                                                      |
| 1496      | <i>CTNNA2</i>     | Lesch et al. 2008                                                      |
| 6531      | <i>DAT1</i>       | Li et al. 2006, Gizer et al. 2009                                      |
| 10655     | <i>DMRT2</i>      | Lasky-Su et al. 2008                                                   |
| 1759      | <i>DNM1</i>       | Lesch et al. 2008                                                      |
| 1815      | <i>DRD4</i>       | Li et al. 2006, Gizer et al. 2009                                      |
| 1816      | <i>DRD5</i>       | Li et al. 2006, Gizer et al. 2009                                      |
| 1843      | <i>DUSP1</i>      | Mick et al. 2010                                                       |
| 79659     | <i>DYNC2H1</i>    | IMAGEII Consortium Group 2010                                          |
| 79071     | <i>ELOVL6</i>     | Mick et al. 2010                                                       |
| 2013      | <i>EMP2</i>       | Mick et al. 2010                                                       |
| 401145    | <i>FAM190A</i>    | Neale et al. 2008                                                      |
| 57795     | <i>FAM5B</i>      | IMAGEII Consortium Group 2010                                          |
| 2272      | <i>FHIT</i>       | Lasky-Su et al. 2008                                                   |
| 2318      | <i>FLNC</i>       | IMAGEII Consortium Group 2010                                          |
| 27086     | <i>FOXP1</i>      | Lasky-Su et al. 2008                                                   |
| 2561      | <i>GABRB2</i>     | IMAGEII Consortium Group 2010                                          |
| 54438     | <i>GFOD1</i>      | Lasky-Su et al. 2008                                                   |
| 10082     | <i>GPC6</i>       | Lesch et al. 2008                                                      |
| 2897      | <i>GRIK1</i>      | Lasky-Su et al. 2008                                                   |
| 3098      | <i>HK1</i>        | IMAGEII Consortium Group 2010                                          |
| 80201     | <i>HKDC1</i>      | IMAGEII Consortium Group 2010                                          |
| 3351      | <i>HTR1B</i>      | Gizer et al. 2009                                                      |
| 3603      | <i>IL16</i>       | Lasky-Su et al. 2008                                                   |
| 22801     | <i>ITGA11</i>     | Lesch et al. 2008                                                      |
| 3682      | <i>ITGAE</i>      | Lesch et al. 2008                                                      |
| 3709      | <i>ITPR2</i>      | Neale et al. 2008                                                      |

|        |                 |                               |
|--------|-----------------|-------------------------------|
| 3746   | <i>KCNC1</i>    | Lesch et al. 2008             |
| 80333  | <i>KCNIP4</i>   | Neale et al. 2008             |
| 375616 | <i>KCP</i>      | IMAGEII Consortium Group 2010 |
| 11061  | <i>LECT1</i>    | Mick et al. 2010              |
| 53353  | <i>LRP1B</i>    | IMAGEII Consortium Group 2010 |
| 4122   | <i>MAN2A2</i>   | Lesch et al. 2008             |
| 4131   | <i>MAP1B</i>    | Lesch et al. 2008             |
| 154141 | <i>MBOAT1</i>   | Lasky-Su et al. 2008          |
| 79772  | <i>MCTP1</i>    | Mick et al. 2010              |
| 4212   | <i>MEIS2</i>    | Lasky-Su et al. 2008          |
| 10893  | <i>MMP24</i>    | Lesch et al. 2008             |
| 4336   | <i>MOBP</i>     | Lesch et al. 2008             |
| 57504  | <i>MTA3</i>     | Lasky-Su et al. 2008          |
| 23040  | <i>MYT1L</i>    | Lesch et al. 2008             |
| 344148 | <i>NAP5</i>     | Lasky-Su et al. 2008          |
| 93100  | <i>NAPRT1</i>   | Lasky-Su et al. 2008          |
| 23327  | <i>NEDD4L</i>   | Neale et al. 2008             |
| 4842   | <i>NOS1</i>     | Lasky-Su et al. 2008          |
| 9378   | <i>NRXN1</i>    | IMAGEII Consortium Group 2010 |
| 51559  | <i>NT5DC3</i>   | Lesch et al. 2008             |
| 4924   | <i>NUCB1</i>    | Neale et al. 2008             |
| 30010  | <i>NXPH1</i>    | IMAGEII Consortium Group 2010 |
| 114885 | <i>OSBPL11</i>  | IMAGEII Consortium Group 2010 |
| 200373 | <i>PCDP1</i>    | Lesch et al. 2008             |
| 57460  | <i>PPM1H</i>    | IMAGEII Consortium Group 2010 |
| 80243  | <i>PREX2</i>    | IMAGEII Consortium Group 2010 |
| 5592   | <i>PRKG1</i>    | IMAGEII Consortium Group 2010 |
| 27303  | <i>RBMS3</i>    | Mick et al. 2010              |
| 7905   | <i>REEP5</i>    | Lesch et al. 2008             |
| 6095   | <i>RORA</i>     | Neale et al. 2008             |
| 83699  | <i>SH3BGRL2</i> | Neale et al. 2008             |
| 28232  | <i>SLCO3A1</i>  | Lasky-Su et al. 2008          |
| 6616   | <i>SNAP25</i>   | Gizer et al. 2009             |
| 55084  | <i>SOBP</i>     | IMAGEII Consortium Group 2010 |
| 50859  | <i>SPOCK3</i>   | Neale et al. 2008             |
| 8464   | <i>SUPT3H</i>   | Lesch et al. 2008             |
| 256536 | <i>TCERG1L</i>  | IMAGEII Consortium Group 2010 |
| 7093   | <i>TLL2</i>     | Lesch et al. 2008             |
| 54600  | <i>UGT1A9</i>   | Mick et al. 2010              |
| 219699 | <i>UNC5B</i>    | Lesch et al. 2008             |
| 57178  | <i>ZMIZ1</i>    | Neale et al. 2008             |
| 79750  | <i>ZNF385D</i>  | Lasky-Su et al. 2008          |
| 23090  | <i>ZNF423</i>   | Lasky-Su et al. 2008          |
| 27300  | <i>ZNF544</i>   | Lasky-Su et al. 2008          |

---
