# Supplementary material for: ADHD-associated dopamine transporter, latrophilin and neurofibromin share a dopamine-related locomotor signature in Drosophila
Source: PubMed Central journal article supplement — Mol Psychiatry. 2015 May 12;21(4):565–73. doi: 10.1038/mp.2015.55 (PMC4804182; doi:10.1038/mp.2015.55), 2015-05-12
Supplement: mp201555x7.pdf [file mp201555x7.pdf]

**Supplementary Table 3A. *Drosophila* behavior-based candidate gene set**

| <b>FlyBase ID</b>       | <b><i>Drosophila</i> Gene Name</b> | <b>Human Entrez ID</b> | <b>Human Gene Name</b> | <b>Citation from reference</b>                                                                                                                                                                                                                 | <b>Reference</b>                     |
|-------------------------|------------------------------------|------------------------|------------------------|------------------------------------------------------------------------------------------------------------------------------------------------------------------------------------------------------------------------------------------------|--------------------------------------|
| FBgn0023129             | <i>aay</i>                         | 5723                   | <i>PSPH</i>            | aay[S042314] flies exhibit increased ethanol-induced hyperactivity and reduced ethanol sedation sensitivity and sedation tolerance compared to controls                                                                                        | Kong et al., 2010                    |
| FBgn0040079             | <i>Akap200</i>                     | 10409                  | <i>BASP1</i>           | Akap200[NP6271] flies exhibit increased ethanol-induced hyperactivity during the first ethanol exposure, but reduced locomotor activity upon repeated ethanol exposure compared to controls.                                                   | Kong et al., 2010                    |
| FBgn0050420             | <i>Atf-2</i>                       | 56654                  | <i>NPDC1</i>           | the locomotor activity of dATF-2 knockdown flies was 59% higher than that of control flies, overexpressing flies exhibited a 34% lower locomotor activity. dATF-2 suppresses locomotor activity but does not affect its circadian regulation.  | Shimizu et al., 2008                 |
| FBgn0039213             | <i>atl</i>                         | 51062                  | <i>ATL1</i>            | Mutants are "bang sensitive", being paralysed by mechanical shock; 44% of 10 day old mutant flies and 83% of 15 day old mutant flies are paralysed after vortexing for 5 seconds. reduced locomotor activity compared to control flies.        | Lee et al., 2008                     |
| FBgn0002921             | <i>Atpalpha</i>                    | 478                    | <i>ATP1A3</i>          | Demonstrates bang sensitivity. Vortexing for 10 seconds causes 5-10 sec paralysis proceeding through staggering to normal behaviour over the course of 1-2 mins., severe defects in movement and phototactic behaviour, and are bang sensitive | Hurd et al., 1996, Feng et al., 1997 |
| <b>ADHD</b> FBgn0087007 | <b><i>bbg</i></b>                  | <b>3603</b>            | <b><i>IL16</i></b>     | The gene is named "big bang" based on the fact that the gene is quite large, and mutants all appear to be mildly bang-sensitive.                                                                                                               | Kim et al., 2006                     |
| FBgn0050077             | <i>Blos1</i>                       | 2647                   | <i>BLOC1S1</i>         | blos1[ex2] homozygous flies show locomotor hyperactivity, including rapid jumping and running as well as interrupted flight.                                                                                                                   | Cheli et al., 2010                   |
| FBgn0031150             | <i>bves</i>                        | 11149                  | <i>BVES</i>            | bves[f01175] flies exhibit increased ethanol-induced hyperactivity during the first ethanol exposure, but reduced locomotor activity upon repeated ethanol exposure compared to controls.                                                      | Kong et al., 2010                    |
| FBgn0263006             | <i>Ca-P60A</i>                     | 487                    | <i>ATP2A1</i>          | comt; Kum double mutants are hyperactive and display activity-dependent synaptic growth and transmitter release                                                                                                                                | Freeman et al., 2010                 |
| FBgn0005563             | <i>cac</i>                         | 774                    | <i>CACNA1B</i>         | bang-sensitive                                                                                                                                                                                                                                 | Chan et al., 2002                    |
| FBgn0002022             | <i>Catsup</i>                      | 7922                   | <i>SLC39A7</i>         | For example, the rare allele at the site affecting lifespan is associated with increased longevity, and the rare 57 bp deletion is associated with increased locomotor reactivity (Table S4)                                                   | Carbone et al., 2006                 |
| FBgn0037890             | <i>CG17734</i>                     | 613227                 | <i>HIGD1C</i>          | CG17734[KG06609] flies exhibit increased ethanol-induced hyperactivity during the first ethanol exposure, but reduced locomotor activity upon repeated ethanol exposure compared to controls.                                                  | Kong et al., 2010                    |

|             |                                   |                            |                     |                           |                                                                                                                                                                                                                                                                     |                                             |
|-------------|-----------------------------------|----------------------------|---------------------|---------------------------|---------------------------------------------------------------------------------------------------------------------------------------------------------------------------------------------------------------------------------------------------------------------|---------------------------------------------|
|             | FBgn0029823                       | CG3011                     | 6470                | SHMT1                     | CG3011[NP6075] flies exhibit increased ethanol-induced hyperactivity compared to controls.                                                                                                                                                                          | Kong et al., 2010                           |
|             | FBgn0035088                       | CG3776                     | 79568               | C2orf47                   | The total distances moved by the EP835/Gal4 flies during the 2 h recording period were significantly greater than by wild type Oregon R flies                                                                                                                       | Liu et al., 2008                            |
|             | FBgn0035989                       | CG3967                     | 79969               | ATAT1                     | CG3967[KG05974] flies exhibit increased ethanol-induced hyperactivity compared to controls.                                                                                                                                                                         | Kong et al., 2010                           |
|             | FBgn0261570                       | CG42684                    | 153090              | DAB2IP                    | CG42270[NP3418] flies exhibit increased ethanol-induced hyperactivity during the first ethanol exposure                                                                                                                                                             | Kong et al., 2010                           |
|             | FBgn0027579                       | CG5508                     | 57678               | GPAM                      | CG5508[NP0579] flies exhibit increased ethanol-induced hyperactivity during the first ethanol exposure, but reduced locomotor activity upon repeated ethanol exposure compared to controls?                                                                         | Kong et al., 2010                           |
| <b>ADHD</b> | <b>FBgn0014141</b><br>FBgn0000346 | <i>cher</i><br><i>comt</i> | <b>2318</b><br>4905 | <b>FLNC</b><br><i>NSF</i> | less than normal optomotor response, opposite from <i>rut</i> and <i>dnc comt</i> ; <i>Kum</i> double mutants are hyperactive and display activity-dependent synaptic growth and transmitter release                                                                | van Swinderen, 2009<br>Freeman et al., 2010 |
|             | FBgn0000363                       | <i>cpo</i>                 | 348093              | <i>RBPMS2</i>             | We show that mutation of <i>cpo</i> leads to bang-sensitive paralysis, seizure susceptibility, and synaptic transmission defects.                                                                                                                                   | Glasscock, 2005                             |
|             | FBgn0014467                       | <i>CrebB-17A</i>           | 1385                | <i>CREB1</i>              | Repetitive exposures to nicotine induce a hyper-responsiveness via the cAMP/PKA/CREB signal pathway in <i>Drosophila</i>                                                                                                                                            | Hou et al., 2004                            |
| <b>ADHD</b> | <b>FBgn0034136</b>                | <b>DAT</b>                 | <b>6531</b>         | <b>SLC6A3</b>             | This indicates that <i>DAT<sup>fmn</sup></i> mutants are hyperactive because they have a longer period of daily activity rather than being more active during any given activity period. <i>DAT<sup>fmn</sup></i> flies are hyper-responsive to mechanical stimuli. | Kume et al., 2005                           |
|             | FBgn0000479                       | <i>dnc</i>                 | 5142                | <i>PDE4B</i>              | Attention defects in these mutants were associated with distinct optomotor effects in behavioral assays.                                                                                                                                                            | van Swinderen et al., 2007                  |
|             | FBgn0000504                       | <i>dsx</i>                 | 1761                | <i>DMRT1</i>              | XY males show courtship sluggishness when compared to wild type siblings, though they are generally hyperactive.                                                                                                                                                    | Villella and Hall, 1996                     |
|             | FBgn0000535                       | <i>eag</i>                 | 27133               | <i>KCNH5</i>              | <i>eag<sup>i°2</sup></i> . When initially isolated, this strain was extremely hyperactive, even by comparison with all other hyperactive mutants.                                                                                                                   | Homyk et al., 1980                          |
|             | FBgn0000536                       | <i>eas</i>                 | 55224               | <i>ETNK2</i>              | A brief bang causes a period of hyperactivity lasting 1-2s, during which flies fall over and vigorously flap their wings, shake and bend their legs, and flex their abdomens. The activity rapidly gives way to paralysis. After 20-30s, hyperactivity begins.      | Pavlidis et al., 1994                       |
|             | FBgn0031604                       | <i>Elp3</i>                | 55140               | <i>ELP3</i>               | Targeted reduction of <i>Dmel\ELP3</i> in the nervous system causes an increase in climbing and locomotor activities and a loss of sleep in flies                                                                                                                   | Singh et al., 2010                          |
|             | FBgn0020440                       | <i>Fak56D</i>              | 5747                | <i>PTK2</i>               | decreased lifespan accompanied by a bang sensitivity that can be induced by mechanical and high-frequency electrical stimulation                                                                                                                                    | Ueda et al., 2008                           |

|             |                    |                   |             |                       |                                                                                                                                                                                                                                                    |                           |
|-------------|--------------------|-------------------|-------------|-----------------------|----------------------------------------------------------------------------------------------------------------------------------------------------------------------------------------------------------------------------------------------------|---------------------------|
| <b>ADHD</b> | <b>FBgn0000721</b> | <i>for</i>        | <b>5592</b> | <b><i>PRKG1</i></b>   | For[R] adults are significantly more active compared to for[s] adults in a locomotor activity assay.                                                                                                                                               | MacPherson et al., 2004   |
|             | FBgn0026718        | <i>fu12</i>       | 10554       | <b><i>AGPAT1</i></b>  | fu12[EP1138] flies exhibit increased ethanol-induced hyperactivity during the first ethanol exposure, but reduced locomotor activity upon repeated ethanol exposure compared to controls.                                                          | Kong et al., 2010         |
|             | FBgn0039487        | <i>gb</i>         | 9057        | <b><i>SLC7A6</i></b>  | genderblind mutants display faster recovery and increased negative geotaxis after strong mechanical stimuli (e.g., they climb faster and farther after vial banging)                                                                               | Featherstone et al., 2009 |
|             | FBgn0001203        | <i>Hk</i>         | 8514        | <b><i>KCNAB2</i></b>  | Walking activity is not affected by age in Hk[1] flies, which remain hyperactive relative to their wild-type siblings from day 2 until death. Late in life, Hk[1] flies are hyperactive but are no longer short-sleepers.                          | Bushey et al., 2010       |
|             | FBgn0025777        | <i>homer</i>      | 9455        | <b><i>HOMER2</i></b>  | homer mutants are hyperactive for both spontaneous locomotion and courtship behavior, implicating Homer in the control of locomotor activity.                                                                                                      | Diagana et al., 2002      |
|             | FBgn0027655        | <i>htt</i>        | 3064        | <b><i>HTT</i></b>     | The HD-Q93 flies develop age-dependent neurodegenerative phenotypes in adults, which manifest as initial hyperactivity followed by a gradual loss of coordination and a decline in locomotor ability, with eventual death at around 20 days of age | Zhang et al., 2009        |
|             | FBgn0016672        | <i>lpp</i>        | 3628        | <b><i>INPP1</i></b>   | The flies showed mild but reproducible hyper-excitability: they displayed the characteristic twitching of the legs seen in Shaker-like mutants while recovering from the anesthetic effects of diethyl ether.                                      | Acharya et al., 1998      |
|             | FBgn0028371        | <i>jbug</i>       | 2317        | <b><i>FLNB</i></b>    | Phenotype: Bang-sensitive Location: Chromosome 2R-59A Name: jitterbug Abbreviation:jbug                                                                                                                                                            | Song et al., 2006         |
|             | FBgn0010052        | <i>Jhe</i>        | 283848      | <b><i>CES4A</i></b>   | Jhe[e01859] flies exhibit increased ethanol-induced hyperactivity during the first ethanol exposure, but reduced locomotor activity upon repeated ethanol exposure compared to controls.                                                           | Kong et al., 2010         |
|             | FBgn0261794        | <i>kcc</i>        | 6560        | <b><i>SLC12A4</i></b> | The penetrance of bang sensitivity in these flies decreases rapidly with age.                                                                                                                                                                      | Hekmat-Scafe et al., 2006 |
|             | FBgn0086133        | <i>kdn</i>        | 1431        | <b><i>CS</i></b>      | We mapped the bang-sensitive seizure mutation knockdown (kdn) to cytological position 5F3 and identified citrate synthase as the affected gene.                                                                                                    | Fergestad et al., 2006    |
|             | FBgn0034877        | <i>levy</i>       | 1337        | <b><i>COX6A1</i></b>  | progressive bang-induced paralysis in levy mutants                                                                                                                                                                                                 | Liu et al., 2007          |
|             | FBgn0259481        | <i>Mob2</i>       | 81532       | <b><i>MOB2</i></b>    | less than normal optomotor response, opposite from rut and dnc                                                                                                                                                                                     | van Swinderen, 2009       |
|             | FBgn0013672        | <i>mt:ATPase6</i> | 4508        | <b><i>MT-ATP6</i></b> | Both sesB1 (ANT1) and ATP61 mutants have reduced locomotor function and conditional paralysis brought on by mechanical stress.                                                                                                                     | Celotto et al., 2006      |
|             | FBgn0037705        | <i>mura</i>       | 22838       | <b><i>RNF44</i></b>   | less than normal optomotor response, opposite from rut and dnc                                                                                                                                                                                     | van Swinderen, 2009       |
|             | FBgn0033764        | <i>nemy</i>       | 27165       | <b><i>GLS2</i></b>    | The mutant males show an increased level of locomotor activity unrelated to courtship, and spend more time in such an element of courtship as pursuit.                                                                                             | Kamyshev et al., 2002     |

|             |                  |        |                 |                                                                                                                                                                                                                                                                    |                                                       |
|-------------|------------------|--------|-----------------|--------------------------------------------------------------------------------------------------------------------------------------------------------------------------------------------------------------------------------------------------------------------|-------------------------------------------------------|
| FBgn0086768 | <i>Pcmt</i>      | 5110   | <i>PCMT1</i>    | Flies overexpressing PCMT consistently exhibited increased locomotor activity (data not shown).                                                                                                                                                                    | Chavous et al., 2001                                  |
| FBgn0003068 | <i>per</i>       | 8864   | <i>PER2</i>     | The new mutation also leads to a tendency for flies to be hyperactive during activity monitoring and is thus dissimilar to the other arrhythmic variants in the <i>per</i> gene but similar to the effects of a deletion of the locus.                             | Hamblen-Coyle et al., 1989                            |
| FBgn0000273 | <i>Pka-C1</i>    | 5566   | <i>PRKACA</i>   | Repetitive exposures to nicotine induce a hyper-responsiveness via the cAMP/PKA/CREB signal pathway in <i>Drosophila</i>                                                                                                                                           | Hou et al., 2004                                      |
| FBgn0005626 | <i>ple</i>       | 7054   | <i>TH</i>       | mutant (TbH) with increased tyramine and depleted octopamine levels displays normal ethanol sensitivity, a startle repression, and hyperactivates more in response to ethanol.                                                                                     | Scholz et al., 2005                                   |
| FBgn0004363 | <i>porin</i>     | 7417   | <i>VDAC2</i>    | Homozygous flies are bang-sensitive, showing a 2-3 fold increase in recovery time compared to wild-type controls.                                                                                                                                                  | Graham et al., 2010                                   |
| FBgn0004595 | <i>pros</i>      | 5629   | <i>PROX1</i>    | The fact that CI and locomotor activity in these mutant males and in heterozygous <i>prosV1</i> males were similarly increased suggests that one copy of defective <i>prosV</i> mutation can cause these male-specific behavioural defects.                        | Grosjean et al., 2004                                 |
| FBgn0033068 | <i>Ptr</i>       | 139411 | <i>PTCHD1</i>   | <i>Ptr</i> [NP2732] flies exhibit increased ethanol-induced hyperactivity during the first ethanol exposure, but reduced locomotor activity upon repeated ethanol exposure compared to controls?                                                                   | Kong et al., 2010                                     |
| FBgn0051005 | <i>qless</i>     | 23590  | <i>PDSS1</i>    | This alleles appears to have a dominant neurological or motor defect, although we have not confirmed that the phenotype observed in the balanced stock is caused by the insertion allele. CG31005EP984/TM6B adults have twitchy movements and they are flightless. | Bloomington <i>Drosophila</i> Stock Center, 2005.10.7 |
| FBgn0030318 | <i>rho-4</i>     | 54933  | <i>RHBDL2</i>   | <i>rho-4</i> [NP3452] flies exhibit increased ethanol-induced hyperactivity during the first ethanol exposure, which increases with repeated ethanol exposure compared to controls?                                                                                | Kong et al., 2010                                     |
| FBgn0261461 | <i>RhoGAP18B</i> | 57636  | <i>ARHGAP23</i> | Adult overexpression of <i>RhoGAP18B</i> [RA.Scer\UAS] in wild-type flies (Scer\GAL4[whir3]/+, Scer\GAL80[ts. $\alpha$ Tub84B]; Avic\GFP[Scer\UAS]) causes a significant increase in ethanol-induced hyperactivity, compared to wild-type.                         | Rothenfluh et al., 2006                               |
| FBgn0003301 | <i>rut</i>       | 114    | <i>ADCY8</i>    | amnesiac ( <i>amn</i> ) and rutabaga ( <i>rut</i> ) show similarly increased sensitivity to ethanol in the inebriometer, an apparatus that quantifies the effects of ethanol on postural control                                                                   | Wolf et al., 2002                                     |
| FBgn0003328 | <i>scb</i>       | 8516   | <i>ITGA8</i>    | <i>scb</i> [NP7060] flies exhibit increased ethanol-induced hyperactivity during the first ethanol exposure, but reduced locomotor activity upon repeated ethanol exposure compared to controls.                                                                   | Kong et al., 2010                                     |

|             |                    |                    |             |                     |                                                                                                                                                                                                                                            |                           |
|-------------|--------------------|--------------------|-------------|---------------------|--------------------------------------------------------------------------------------------------------------------------------------------------------------------------------------------------------------------------------------------|---------------------------|
|             | FBgn0052056        | <i>scramb1</i>     | 5359        | <i>PLSCR1</i>       | The Scramblase double-mutant flies appear visibly more active in a vial compared with either of the single mutants or the control w1118 flies.                                                                                             | Acharya et al., 2006      |
|             | FBgn0035390        | <i>scramb2</i>     | 57047       | <i>PLSCR2</i>       | The Scramblase double-mutant flies appear visibly more active in a vial compared with either of the single mutants or the control w1118 flies.                                                                                             | Acharya et al., 2006      |
|             | FBgn0015541        | <i>sda</i>         | 206338      | <i>AQPEP</i>        | Homozygous flies show 100% bang sensitivity.                                                                                                                                                                                               | Hekmat-Scafe et al., 2005 |
|             | FBgn0003353        | <i>sei</i>         | 81033       | <i>KCNH6</i>        | Mutations in the seizure ( <i>sei</i> ) locus cause temperature-induced hyperactivity, followed by paralysis                                                                                                                               | Wang et al., 1997         |
|             | FBgn0003360        | <i>sesB</i>        | 291         | <i>SLC25A4</i>      | Our studies of the <i>Drosophila</i> ATP61 and <i>sesB1</i> (ANT1) mutations revealed common phenotypes, including conditional paralysis, shortened lifespan, and degeneration of the neuromuscular system.                                | Celotto et al., 2006      |
|             | FBgn0003380        | <i>Sh</i>          | 3736        | <i>KCNA1</i>        | Hyperexcitable mutants like <i>Sh</i> display abnormal leg shaking and wing scissoring in etherized adults                                                                                                                                 | Mosca, 2005               |
| <b>ADHD</b> | <b>FBgn0003386</b> | <b><i>Shaw</i></b> | <b>3746</b> | <b><i>KCNC1</i></b> | Expression of <i>Shaw</i> [ <i>RA.Scer\UAS.T:Zzzz\FLAG</i> ] in clock cells under the control of <i>Scer\GAL4[tim.PE]</i> causes flies to have more locomotor activity compared to controls. Activity is significantly increased at night. | Hodge and Stanewsky, 2008 |
|             | FBgn0003464        | <i>sol</i>         | 6650        | <i>SOLH</i>         | they are hyperactive, and they have a weak, abnormal optomotor response                                                                                                                                                                    | Miklos et al., 1987       |
|             | FBgn0086370        | <i>sra</i>         | 10231       | <i>RCAN2</i>        | Loss of <i>Sra</i> , a homolog of human <i>DSCR1</i> , induces locomotor hyperactivity in <i>Drosophila</i>                                                                                                                                | Shin et al., 2006         |
|             | FBgn0086784        | <i>stmA</i>        | 22979       | <i>EFR3B</i>        | <i>stmA1</i> and <i>stmAP1</i> adults are hypoactive and <i>stmA2</i> hyperactive                                                                                                                                                          | Kumar et al., 2001        |
|             | FBgn0003714        | <i>tko</i>         | 6183        | <i>MRPS12</i>       | Hemizygous males and homozygous females show a strong bang-sensitive phenotype with a mean recovery of over 30 seconds after 10 seconds of vortexing.                                                                                      | Toivonen et al., 2001     |
|             | FBgn0086355        | <i>Tpi</i>         | 7167        | <i>TPI1</i>         | Mutants show a bang sensitive phenotype at both room temperature and at 29°C, taking longer to recover from mechanical stress than control flies                                                                                           | Seigle et al., 2008       |
|             | FBgn0010287        | <i>Trf</i>         | 6908        | <i>TBP</i>          | Ether-induced leg shaking and male sterility due to immotile sperm. Shaker phenotype.                                                                                                                                                      | Crowley et al., 1993      |
|             | FBgn0086782        | <i>amn</i>         | na          | <i>na</i>           | amnesiac ( <i>amn</i> ) and rutabaga ( <i>rut</i> ) show similarly increased sensitivity to ethanol in the inebriometer, an apparatus that quantifies the effects of ethanol on postural control [mouse model is hyperactive: PACAP]       | Wolf et al., 2002         |
|             | FBgn0033928        | <i>Arc2</i>        | na          | <i>na</i>           | <i>Arc2</i> [ <i>EY14313</i> ] flies exhibit increased ethanol-induced hyperactivity and reduced ethanol sedation sensitivity and sedation tolerance compared to controls?                                                                 | Kong et al., 2010         |

|             |              |    |           |                                                                                                                                                                                                                                                    |                                |
|-------------|--------------|----|-----------|----------------------------------------------------------------------------------------------------------------------------------------------------------------------------------------------------------------------------------------------------|--------------------------------|
| FBgn0028374 | <i>hug</i>   | na | <i>na</i> | a lower hug level correlates with increased food-seeking behavior since <i>Drosophila</i> larvae become hyperactive and disperse when food is removed                                                                                              | Melcher et al., 2005           |
| FBgn0086912 | <i>mbm</i>   | na | <i>na</i> | Increase motor response                                                                                                                                                                                                                            | Martin et al., 1998            |
| FBgn0003015 | <i>osk</i>   | na | <i>na</i> | All the memory mutants we have found that compromise attention-like phenotypes target MB function: radish (van Swinderen and Brembs, submitted), dunce, rutabaga, D0067, and D0264.                                                                | van Swinderen, 2009            |
| FBgn0260499 | <i>qvr</i>   | na | <i>na</i> | This mutation is similar in phenotype to the Shaker (Sh), ether-a-gogo ( <i>eag</i> ), and Hyperkinetic (Hk) mutations, all of which affect potassium channel function in <i>D. melanogaster</i> .                                                 | Humphreys et al., 1996         |
| FBgn0261379 | <i>rad</i>   | na | <i>na</i> | In both behavioral and brain-recording assays, radish mutant flies consistently displayed responses characteristic of a reduced attention span, with more frequent perceptual alternations and more random behavior compared with wild-type flies. | van Swinderen and Brembs, 2010 |
| FBgn0085387 | <i>shakB</i> | na | <i>na</i> | Adultflies mutant for shaking-B or Passover are hyperactive and have difficulty flying, they also exhibit uncoordinated leg movements under ether anaesthesia                                                                                      | Perrimon et al., 1989          |
| FBgn0016976 | <i>stnA</i>  | na | <i>na</i> | stnA1/stnA6 flies emerge late, are bang sensitive, uncoordinated, have an abnormal jump response and become rapidly debilitated at 35°C.                                                                                                           | Miklos et al., 1987            |

---

Supplementary Table 3B. Randomly generated gene sets (n=20)

| set 1  | Entrez ID | Gene Name   | set 2       | Entrez ID    | Gene Name | set 3  | Entrez ID | Gene Name | set 4  | Entrez ID | Gene Name | set 5  | Entrez ID  | Gene Name | set 6     | Entrez ID     | Gene Name | set 7  | Entrez ID | Gene Name | set 8   | Entrez ID  | Gene Name |
|--------|-----------|-------------|-------------|--------------|-----------|--------|-----------|-----------|--------|-----------|-----------|--------|------------|-----------|-----------|---------------|-----------|--------|-----------|-----------|---------|------------|-----------|
| 3725   | JUN       |             | 83886       | PRSS27       |           | 85508  | SCRT2     |           | 253190 | SERHL2    |           | 7779   | SLC30A1    |           | 79956     | ERMP1         |           | 84131  | CEP78     |           | 253959  | RALGAP1A   |           |
| 57647  | DHX37     |             | 5926        | ARID4A       |           | 1730   | DIAPH2    |           | 4552   | MTRR      |           | 3906   | LALBA      |           | 0         | RP11-392O18.1 |           | 27125  | AFF4      |           | 4216    | MARPK4     |           |
| 124808 | CCDC43    |             | 23413       | NCS1         |           | 4512   | MT-CO1    |           | 53635  | PTOV1     |           | 26103  | LRI1       |           | 6860      | SYT4          |           | 60561  | RINT1     |           | 55737   | VP535      |           |
| 221223 | CESSA     |             | 6583        | SLC22A4      |           | 92715  | WDR85     |           | 11325  | DDX42     |           | 23230  | VSP13A     |           | 8675      | STX16         |           | 27258  | LSM3      |           | 5134    | PDCD2      |           |
| 56934  | CA10      |             | 79660       | PPP1R3B      |           | 5937   | RBMS1     |           | 51495  | PTPLAD1   |           | 64506  | CPEB1      |           | 84365     | MK67IP        |           | 27019  | DNAI1     |           | 9772    | KIAA0195   |           |
| 8453   | CUL2      |             | 153020      | RASGEF1B     |           | 90580  | C19orf52  |           | 5192   | PEX10     |           | 122402 | TRDR9      |           | 56267     | CKBL2         |           | 283130 | SLC25A45  |           | 128989  | C22orf25   |           |
| 7802   | DNAL1     |             | 6522        | SLC4A2       |           | 9390   | SLC22A13  |           | 1600   | DAB1      |           | 3329   | HSPD1      |           | 23464     | GCAT          |           | 529    | ATP6V1E1  |           | 57661   | PHRF1      |           |
| 1105   | CHD1      |             | 6611        | SMS          |           | 54858  | PGPEP1    |           | 51816  | CECR1     |           | 79568  | C2orf47    |           | 51365     | FLA1A         |           | 6834   | SURF1     |           | 84249   | FSD2       |           |
| 94233  | OPN4      |             | 4976        | OPA1         |           | 222894 | FERD3L    |           | 285521 | COX18     |           | 9319   | TRIP13     |           | 132789    | GNPDA2        |           | 55334  | SLC39A9   |           | 7982    | ST7        |           |
| 10445  | MCRS1     |             | 90864       | SPSB3        |           | 56946  | C11orf30  |           | 5885   | RAD21     |           | 84769  | MPV17L2    |           | 51008     | ASCC1         |           | 59342  | SCPEP1    |           | 83693   | HSOL1      |           |
| 10901  | DHRS4     |             | 9791        | PTDSS1       |           | 2230   | FDX1      |           | 7162   | TPBG      |           | 25876  | TPBG       |           | 143884    | CWF19L2       |           | 23132  | RAD54L2   |           | 123096  | SLC25A29   |           |
| 54831  | BEST2     |             | 30845       | EHD3         |           | 128486 | FITM2     |           | 57104  | PNPLA2    |           | 84188  | FAR1       |           | 662       | BNIP1         |           | 2119   | ETV5      |           | 11197   | WIF1       |           |
| 4069   | LYZ       |             | 4089        | SMAD4        |           | 51236  | FAM203A   |           | 284129 | SLC26A11  |           | 64106  | NPPFR1     |           | 84271     | POLDIP3       |           | 29925  | GMPPB     |           | 80164   | ACO10336.1 |           |
| 149998 | LIPI      |             | 64151       | NCAPG        |           | 285282 | RABL3     |           | 4597   | MVD       |           | 112950 | MED8       |           | 1506      | CTRL          |           | 57062  | DDX24     |           | 3008    | HIST1H1E   |           |
| 112840 | WDR89     |             | 1831        | TSC2D3       |           | 51     | ACOX1     |           | 1577   | CYP3A5    |           | 405753 | DUOXA2     |           | 64121     | RRRAGC        |           | 6934   | TCF7L2    |           | 28970   | C11orf54   |           |
| 10539  | GLRX3     |             | 3720        | JARID2       |           | 3142   | HLX       |           | 55750  | AGK       |           | 55740  | ENAH       |           | 146923    | RUNDC1        |           | 978    | CDA       |           | 129531  | MITD1      |           |
| 6621   | SNAPC4    |             | 9221        | SNAPC1       |           | 9371   | KIF3B     |           | 55109  | AGGF1     |           | 80148  | PQLC1      |           | 79892     | MCMBP         |           | 51306  | FAM13B    |           | 80119   | PIF1       |           |
| 5406   | PNLIP     |             | 217         | ALDH2        |           | 25873  | RPL36     |           | 140735 | DYNLL2    |           | 79657  | RPAP3      |           | 79002     | C19orf43      |           | 84239  | ATP13A4   |           | 92715   | WDR85      |           |
| 23076  | RRP1B     |             | 9355        | LHX2         |           | 3248   | HPGD      |           | 9899   | SV2B      |           | 5728   | PTEN       |           | 22911     | WDR47         |           | 129831 | RBM45     |           | 51241   | COX16      |           |
| 29882  | ANAPC2    |             | 2521        | FUS          |           | 51637  | C14orf166 |           | 3131   | HLF       |           | 4686   | NCBP1      |           | 26088     | GGA1          |           | 388753 | C1orf31   |           | 84193   | SETD3      |           |
| 493753 | C2orf64   |             | 23383       | MAU2         |           | 10367  | FAF1      |           | 5230   | PGK1      |           | 10367  | CBARA1     |           | 2551      | GABPA         |           | 4038   | LRP4      |           | 51150   | SDFA       |           |
| 9978   | RBX1      |             | 8661        | EIF3A        |           | 6844   | VAMP2     |           | 5629   | PROX1     |           | 8899   | PRPF4B     |           | 440957    | C3orf78       |           | 6497   | SKI       |           | 7162    | TPBG       |           |
| 26003  | GORASP2   |             | 64167       | ERAP2        |           | 4301   | MLLT4     |           | 534    | ATP6V1G2  |           | 3087   | HROX       |           | 283208    | P4HA3         |           | 338917 | VSX2      |           | 2833285 | MORN3      |           |
| 431705 | ASTL      |             | 2108        | ETFA         |           | 79887  | PLBD1     |           | 1894   | ECT2      |           | 5202   | PFDN2      |           | 79648     | MCPH1         |           | 10933  | MORF4L1   |           | 10458   | BAIAP2     |           |
| 2274   | FHL2      |             | 2752        | GLUL         |           | 54107  | POLE3     |           | 5204   | PFDN5     |           | 51     | ACOX1      |           | 9126      | SMC3          |           | 9446   | GSTO1     |           | 153527  | ZMAT2      |           |
| 8760   | CD52      |             | 58505       | OSTC         |           | 3475   | IFRD1     |           | 949    | SCARB1    |           | 56848  | SPHK2      |           | 56995     | TULP4         |           | 91252  | SLC39A13  |           | 54932   | EXD3       |           |
| 123207 | C15orf40  |             | 10514       | MYBBP1A      |           | 11059  | WWP1      |           | 11059  | WWP1      |           | 1504   | CEP135     |           | 84188     | FAR1          |           | 55206  | SBNO1     |           | 10152   | AB12       |           |
| 79993  | ELOVL7    |             | 2110        | ETFDH        |           | 126789 | PUSL1     |           | 23597  | ACOT9     |           | 10330  | CNPY2      |           | 260429    | PRSS33        |           | 51111  | SUV420H1  |           | 26589   | MRLP46     |           |
| 84705  | GTPBP3    |             | 6293        | VPS52        |           | 4335   | MNT       |           | 11174  | ADAMTS6   |           | 5884   | RAD17      |           | 1939      | EIF2D         |           | 340280 | UNCX      |           | 23474   | ETHE1      |           |
| 149998 | LIPI      |             | 55079       | FEZF7        |           | 153222 | C5orf41   |           | 50636  | ANO7      |           | 3008   | HIST1H1E   |           | 254295    | PHYHD1        |           | 2230   | FDX1      |           | 8315    | BRAP       |           |
| 358    | AQP1      |             | 51596       | CUTA         |           | 405753 | DUOXA2    |           | 1457   | CSNK2A1   |           | 60493  | FASTKD5    |           | 51548     | SIR7E         |           | 84504  | NXK6-2    |           | 51056   | LAP3       |           |
| 79781  | IQCA1     |             | 23426       | GRIP1        |           | 222962 | SLC29A4   |           | 9328   | SIRT2     |           | 22933  | GTF3C5     |           | 3480      | IGF1R         |           | 4999   | ORC2      |           | 30820   | KCNIP1     |           |
| 29925  | GMPPB     |             | 175         | AGA          |           | 2648   | KAT2A     |           | 9861   | PSMD6     |           | 51079  | NDUFA13    |           | 4907      | NTSE          |           | 7170   | TPM3      |           | 284723  | SLC25A34   |           |
| 55174  | INTS10    |             | 56894       | AGPAT3       |           | 51056  | LAP3      |           | 390916 | NUDT19    |           | 97     | ACYP1      |           | 54529     | ASNSD1        |           | 1523   | CUX1      |           | 118424  | UBE2J2     |           |
| 55726  | C12orf11  |             | 6389        | SDHA         |           | 4014   | LOR       |           | 64106  | NPPFR1    |           | 51306  | FAM13B     |           | 7360      | UGP2          |           | 54346  | UNC93A    |           | 8715    | NOL4       |           |
| 55526  | DHTKD1    |             | 25782       | RAB3GAP2     |           | 2562   | GABRB3    |           | 10157  | AASS      |           | 5693   | PMSB5      |           | 83604     | TMEM47        |           | 23125  | CAMTA2    |           | 79568   | C2orf47    |           |
| 3156   | HMGCR     |             | 8301        | PICALM       |           | 10629  | TAF6L     |           | 343702 | XKR7      |           | 51318  | MRLP35     |           | 10476     | ATP5H         |           | 54861  | SNRK      |           | 7465    | WEE1       |           |
| 11333  | PDAP1     |             | 51637       | C14orf166    |           | 26275  | STRADA    |           | 10399  | GNB2L1    |           | 26275  | HIBCH      |           | 9355      | LHX2          |           | 8800   | PEX11A    |           | 28964   | GIT1       |           |
| 5970   | RELA      |             | 25911       | DPCD         |           | 4807   | NHLH1     |           | 54456  | MOV10L1   |           | 9527   | GOSR1      |           | 5864      | RAB3A         |           | 10157  | AASS      |           | 708     | C1QBP      |           |
| 5411   | PNN       |             | 83693       | HSDL1        |           | 57534  | MIB1      |           | 27340  | UTP20     |           | 2072   | ORCC4      |           | 3326      | HSP90AB1      |           | 53831  | GPR84     |           | 89782   | LMLN       |           |
| 4711   | NDUFB5    |             | 1781        | DYNC1I2      |           | 51477  | ISYNA1    |           | 10056  | FAR5B     |           | 4841   | NONO       |           | 2960      | GTF2E1        |           | 142679 | DUSP19    |           | 137695  | TMEM68     |           |
| 54880  | BCOR      | <b>ADHD</b> | <b>3603</b> | <b>IL16</b>  |           | 2132   | EXT2      |           | 27306  | HPGDS     |           | 5422   | POLA1      |           | 4069      | LYZ           |           | 4839   | NOP2      |           | 57649   | PHF12      |           |
| 7084   | TK2       |             | 9945        | GFP22        |           | 285527 | FRYL      |           | 84288  | EPCAB2    |           | 728489 | DNLZ       |           | 474       | ATOH1         |           | 143941 | ZNF407    |           | 56913   | TTC36      |           |
| 30012  | TLX3      |             | 2021        | ENDOG        |           | 4331   | ENMAT1    |           | 79969  | ATAT1     |           | 206338 | ACO10282.1 |           | 55628     | ZNF407        |           | 11171  | STRAP     |           | 1983    | EIF5       |           |
| 80176  | SPSB1     |             | 90637       | ZFAND2A      |           | 10199  | MPHOSPH10 |           | 6726   | SRP9      |           | 79183  | TTPAL      |           | 10153     | CEBPZ         |           | 79157  | MFSD11    |           | 84908   | FAM136A    |           |
| 54825  | CDHR2     | <b>ADHD</b> | <b>3746</b> | <b>KCNC1</b> |           | 9201   | DCLK1     |           | 3398   | ID2       |           | 51759  | C9orf78    |           | 27336     | HTATSF1       |           | 6136   | RPL12     |           | 83855   | KLF16      |           |
| 26994  | RNF11     |             | 821         | CANX         |           | 55611  | OTUB1     |           | 54919  | HEATR2    |           | 9202   | ZMYM4      |           | 2898      | GRK2          |           | 60493  | FASTKD5   |           | 677     | ZFP36L1    |           |
| 9040   | UBE2M     |             | 255426      | RASGEF1C     |           | 79643  | CHMP6     |           | 87178  | PNPT1     |           | 64097  | EPB41L4A   |           | 10090     | UST           |           | 51102  | MECR      |           | 51255   | RNF181     |           |
| 51741  | WVOX      |             | 535         | ATP6VOA1     |           | 3781   | KCNN2     |           | 55266  | TMEM19    |           | 163688 | CALML6     |           | 55711     | FAR2          |           | 7298   | TYMS      |           | 3945    | LDHB       |           |
| 284723 | SLC25A34  |             | 133690      | CAPSL        |           | 9379   | NRXN2     |           | 4783   | NFIL3     |           | 113174 | SAAL1      |           | 26268     | FBXO9         |           | 255426 | RASGEF1C  |           | 10935   | PRDX3      |           |
| 122769 | LRR1      |             | 55814       | BDP1         |           | 25921  | ZDHHC5    |           | 80308  | FLAD1     |           | 266675 | BEST4      |           | 51003     | MED31         |           | 25841  | ABT2      |           | 58508   | MLL3       |           |
| 10459  | MAD2L2    |             | 23519       | ANP32D       |           | 5469   | MED1      |           | 64518  | TEKT3     |           | 10257  | ABCC4      |           | 9895      | TECPR2        |           | 84897  | TBRG1     |           | 1487    | CTBP1      |           |
| 79657  | RPAP3     |             | 2239        | GPC4         |           | 1104   | RCC1      |           | 113510 | HELQ      |           | 9153   | SLC28A2    |           | 59336     | PRDM13        |           | 84539  | MCHR2     |           | 122011  | CSNK1A1L   |           |
| 53     | ACP2      |             | 7307        | UZAF1        |           | 63036  | CELA2A    |           | 51365  | PLA1A     |           | 9772   | KIAA0195   |           | 25909     | AHCTF1        |           | 10449  | ACAA2     |           | 1041    | CDSN       |           |
| 85369  | FAM40A    |             | 23406       | COTL1        |           | 4617   | MYF5      |           | 51312  | NDP88     |           | 4927   | WDR6       |           | 79154     | DHRS11        |           | 9400   | RECQL5    |           | 54455   | FBXO42     |           |
| 23294  | ANKS1A    |             | 130557      | ZNF513       |           | 3175   | ONECUT1   |           | 55112  | WDR6      |           | 22821  | RASA3      |           | 126326    | GIPC3         |           | 51070  | NOSIP     |           | 353     | APRT       |           |
| 51650  | MRPS33    |             | 112399      | EGLN3        |           | 7170   | TPM3      |           | 25940  | FAM98A    |           | 995    | CDCC25C    |           | 9046      | DOK2          |           | 84986  | ARHGAP19  |           | 51081   | MRPS7      |           |
| 54769  | DIRAS2    |             | 8562        | DENR         |           | 80031  | SEMA6D    |           | 317762 | CCDC85C   |           | 10730  | YME1L1     |           | 2764      | GMFB          |           | 29901  | SAC3D1    |           | 260429  | PRSS33     |           |
| 6319   | SCD       |             | 55567       | DNAH3        |           | 200205 | IBA57     |           | 5245   | PHB       |           | 10138  | PHB        |           | 9543      | IGDC33        |           | 527    | ATP6VOC   |           | 996     | CDCC27     |           |
| 79813  | EHMT1     |             | 84487       | DGCR8        |           | 2784   | GNB3      |           | 51646  | YPEL5     |           | 6146   | RPL22      |           | 79039     | DDX54         |           | 6223   | RPS19     |           | 23383   | MAU2       |           |
| 219855 | SLC37A2   |             | 5804        | CREG1        |           | 8243   | SMC1A     |           | 79685  | SAP30L    |           | 9487   | FIGL       |           | 27075     | SPAN13        |           | 7189   | TRAF6     |           | 50674   | NEUROG3    |           |
| 3718   | JAK3      |             | 80155       | NAA15        |           | 80207  | OPA3      |           | 9610   | RIN1      |           | 64318  | NOC3L      |           | 55571     | C2orf29       |           | 1603   | DAD1      |           | 27304   | MOC53      |           |
| 192877 | C22orf39  |             | 55739       | CARKD        |           | 4927   | NUP88     |           | 57864  | SLC46A2   |           | 493753 | C2orf64    |           | 1603      | DAD1          |           | 3141   | HLCS      |           | 9293    | GPR52      |           |
| 728294 | D2HGDH    |             | 1586        | CYP17A1      |           | 2128   | EVX1      |           | 1089   | TXNRD2    |           | 56996  | SLC12A9    |           | 5862      | RBD2A         |           | 147912 | SIX5      |           | 5540    | PPYR1      |           |
| 3312   | HSPA8     |             | 6167        | RPL37        |           | 5136   | PDE1A     |           | 3      | CREBL2    |           | 1117   | CHL3L2     |           | 100131187 | TSTD1         |           | 285672 | SREK1IP1  |           | 2239    | GP4C       |           |
| 55768  | NGLY1     |             | 56986       | DTWD1        |           | 444    | ASPH      |           | 374407 | DNAJB13   |           | 5707   | PSMD1      |           | 55687     | TRMU          |           | 8022   | LHX3      |           | 51499   | TRIP1A     |           |
| 5303   | PIN4      |             | 5170        | PDPK1        |           | 5538   | PTT1      |           | 56344  | CABP5     |           | 164633 | CABP7      |           | 342371    | ATXNL1        |           | 5540   | PPYR1     |           | 1655    | DDX5       |           |
| 95     | ACY1      |             | 390637      | C15orf58     |           | 94015  | TTYH2     |           | 154313 | C6orf165  |           | 10291  | SF3A1      |           | 57577     | KIAA1407      |           | 3421   | IDH3G     |           | 54033   | RBM11      |           |
| 89845  | ABCC1     |             |             |              |           |        |           |           |        |           |           |        |            |           |           |               |           |        |           |           |         |            |           |

| set 9       | Entrez ID    | Gene Name      | set 10 | Entrez ID     | Gene Name | set 11        | Entrez ID        | Gene Name     | set 12 | Entrez ID   | Gene Name | set 13       | Entrez ID | Gene Name    | set 14           | Entrez ID    | Gene Name | set 15 | Entrez ID | Gene Name | set 16 | Entrez ID | Gene Name |
|-------------|--------------|----------------|--------|---------------|-----------|---------------|------------------|---------------|--------|-------------|-----------|--------------|-----------|--------------|------------------|--------------|-----------|--------|-----------|-----------|--------|-----------|-----------|
|             | 6945         | MLX            | 23397  | NCAPH         | 6581      | SLC22A3       | 4015             | LOX           | 22984  | PDCD11      | 5578      | PRKCA        | 23386     | NUDCD3       | 8379             | MADL1        |           |        |           |           |        |           |           |
|             | 10229        | COQ7           | 64419  | MTMR14        | 840       | CASP7         | 6565             | SLC15A2       | 117584 | RFLP        | 6924      | TCEB3        | 2242      | FES          | 9568             | GABBR2       |           |        |           |           |        |           |           |
|             | 92822        | ZNF276         | 57122  | NUP107        | 49855     | SCAPER        | 10051            | SMC4          | 55351  | STK32B      | 9217      | VAPB         | 22796     | COG2         | 1477             | CSTF1        |           |        |           |           |        |           |           |
|             | 84188        | FAR1           | 1781   | DYNC112       | 22919     | MAPRE1        | 10211            | FLOT1         | 64786  | TBC1D15     | 84662     | GLIS2        | 54802     | TRIT1        | 84900            | RNF272       |           |        |           |           |        |           |           |
|             | 11194        | ABCB8          | 23440  | QTP           | 7110      | TMF1          | 201232           | SLC16A13      | 129831 | RBM45       | 84823     | LMNB2        | 54814     | QPCTL        | 1491             | CTH          |           |        |           |           |        |           |           |
|             | 51389        | RWDD1          | 6581   | SLC22A3       | 1576      | CYP3A4        | 246175           | CNO176L       | 9325   | TRIP4       | 1339      | COXA2        | 83938     | C10orf11     | 114826           | SMYD4        |           |        |           |           |        |           |           |
|             | 253190       | SERHL2         | 51654  | CDK5RAP1      | 2925      | GRPR          | 11338            | U2AF2         | 8864   | PER2        | 2050      | EPHB4        | 9055      | PRC1         | 57476            | GRAMD1B      |           |        |           |           |        |           |           |
|             | 54726        | OTUD4          | 51107  | APH1A         | 51218     | GLRX5         | 83440            | ADPGK         | 206338 | ACO10282.1  | 387755    | INSC         | 27339     | PRPF19       | 63908            | NAPB         |           |        |           |           |        |           |           |
|             | 3008         | HIST1H1E       | 65080  | MRPL44        | 51729     | WBP11         | 23071            | ERP44         | 9908   | G3BP2       | 9328      | GTF3C5       | 8563      | THOC5        | 28514            | DLL1         |           |        |           |           |        |           |           |
|             | 144233       | BCDIN3D        | 3642   | INSM1         | 5778      | PTPN7         | 55972            | SLC25A40      | 112399 | EGLN3       | 51479     | ANKFY1       | 6205      | RPS11        | 51529            | ANAPC11      |           |        |           |           |        |           |           |
|             | 51726        | DNAJB11        | 151473 | SLC16A14      | 2648      | KAT2A         | 95               | ACY1          | 260429 | PRSS33      | 29959     | NRBP1        | 9406      | ZRANB2       | 54881            | TEX10        |           |        |           |           |        |           |           |
|             | 54970        | TTC12          | 3074   | HEXB          | 80176     | SPSB1         | 79877            | DCAKD         | 1464   | CSPG4       | 90627     | STAR13       | 4976      | OPA1         | 9589             | WTAP         |           |        |           |           |        |           |           |
|             | 8549         | LGR5           | 83606  | C22orf13      | 55614     | KIF16B        | 7355             | SLC35A2       | 1053   | CEBPE       | 5534      | PPP3R1       | 80279     | CDK5RAP3     | 148979           | GLIS1        |           |        |           |           |        |           |           |
|             | 55735        | DNAJC11        | 84075  | FSCB          | 219409    | GSX1          | 1464             | CSPG4         | 51673  | TPPP3       | 115548    | FCHO2        | 29914     | UBOAA1       | 23005            | MAPKBP1      |           |        |           |           |        |           |           |
|             | 414301       | DDI1           | 339287 | MSL1          | 9973      | CCS           | 9066             | SYT7          | 7737   | RNF113A     | 9869      | SETDB1       | 23054     | NCOA6        | 11231            | SEC63        |           |        |           |           |        |           |           |
|             | 529          | ATP6V1E1       | 3796   | KIF2A         | 117143    | TADA1         | 51084            | CRYL1         | 6608   | SMO         | 481       | ATP1B1       | 84647     | PLA2G12B     | 64146            | COG8         |           |        |           |           |        |           |           |
|             | 10901        | DHRS4          | 55011  | PIH1D1        | 25851     | TECPR1        | 1576             | CYP3A4        | 57799  | RAB40C      | 8988      | HSBP3        | 51389     | RWDD1        | 2729             | GCLC         |           |        |           |           |        |           |           |
|             | 55571        | C2orf29        | 85417  | CCNB3         | 60436     | TGIF2         | 5884             | RAD17         | 55753  | OGDHL       | 2483      | FRG1         | 55218     | EXD2         | 9784             | SINX7        |           |        |           |           |        |           |           |
|             | 125061       | AFMID          | 115825 | WDFY2         | 64786     | TBL1D15       | 254528           | C16orf73      | 255374 | MBLAC1      | 5829      | PXN          | 1362      | CPD          | 83444            | INO108       |           |        |           |           |        |           |           |
|             | 5527         | PPP2R5C        | 6399   | TRAPPC2       | 26103     | LRI1T         | 84858            | ZNF503        | 7205   | TRIP6       | 6557      | SLC12A1      | 51008     | ASCC1        | 3725             | JUN          |           |        |           |           |        |           |           |
|             | 402055       | SRRD           | 5780   | PTPN9         | 10250     | PTPN9         | 55568            | GALNT10       | 9641   | IKRKE       | 29599     | KANK2        | 114826    | SMYD4        | 79598            | CEP97        |           |        |           |           |        |           |           |
|             | 54708        | 40607          | 91147  | TMEM67        | 9790      | BMS1          | 95               | ACY1          | 51399  | TRAPPC4     | 1586      | CYP17A1      | 1117      | CH13L2       | 81554            | WBSRC16      |           |        |           |           |        |           |           |
|             | 79796        | ALG9           | 388585 | HES5          | 85302     | FBF1          | 3008             | HIST1H1E      | 23016  | EXOSC7      | 51398     | C19orf56     | 27039     | PKD2L2       | 9202             | ZMYM4        |           |        |           |           |        |           |           |
|             | 535          | ATP6V0A1       | 9869   | SETDB1        | 4338      | MOC52         | 55611            | OTUB1         | 2571   | GAD1        | 25821     | MTO1         | 55729     | ATF7IP       | 6103             | RPGR         |           |        |           |           |        |           |           |
|             | 11197        | WIF1           | 85414  | SLC45A3       | 84440     | RAB11FIP4     | 23262            | PPP5K2        | 54108  | CHRAC1      | 85302     | FBF1         | 9451      | E1F2AK3      | 54606            | DDX56        |           |        |           |           |        |           |           |
|             | 79660        | PPP1R3B        | 55677  | IWS1          | 9202      | ZMYM4         | 6500             | SKP1          | 9950   | GOLGA5      | 68005     | CHID1        | 5921      | RASA1        | 80164            | ACO10336.1   |           |        |           |           |        |           |           |
|             | 1410         | CRYAB          | 6096   | RORB          | 0         | ALV121963.1   | 10231            | RCAN2         | 1576   | CYP3A4      | 64801     | ARV1         | 84950     | PRPF38A      | 4802             | NFYC         |           |        |           |           |        |           |           |
|             | 255758       | TC1X1D2        | 196385 | DNAH10        | 90        | ACV1R1        | 10645            | CAMKK2        | 150159 | NHEDC1      | 7570      | ZNF22        | 221400    | TDRD6        | 84720            | PIGO         |           |        |           |           |        |           |           |
|             | 284361       | C19orf63       | 54785  | C17orf59      | 1800      | DPEP1         | 57502            | NLGN4X        | 9821   | RB1CC1      | 3516      | RBJF         | 79956     | ERMP1        | 9700             | ESPL1        |           |        |           |           |        |           |           |
|             | 6875         | TAF4B          | 163688 | CALML6        | 9899      | SV2B          | 51433            | ANAPC5        | 29915  | HCFC2       | 27042     | DIEXF        | 5459      | POU4F3       | 4999             | ORC2         |           |        |           |           |        |           |           |
|             | 5814         | PURB           | 9698   | PUM1          | 29970     | IQGJ-SCHIP1   | 23258            | DENND5A       | 51135  | IRAK4       | 84289     | ING5         | 4199      | ME1          | 5191             | PEX7         |           |        |           |           |        |           |           |
|             | 5048         | PAFAH1B1       | 1653   | DDX1          | 28970     | C11orf54      | 93973            | DDX1          | 253190 | SERHL2      | 22888     | UBOX5        | 231       | AKR1B1       | 116840           | CNTROB       |           |        |           |           |        |           |           |
|             | 8100         | IFT88          | 8815   | BANF1         | 118924    | FRA10AC1      | 1053             | CEBPE         | 116151 | C20orf108   | 6582      | SLC22A2      | 151473    | SLC16A14     | 259232           | NALCN        |           |        |           |           |        |           |           |
|             | 6678         | SPARC          | 8394   | PIP5K1A       | 284129    | SLC26A11      | 358              | AQP1          | 538    | ATP7A       | 414149    | ACBD7        | 50999     | TMED5        | 23184            | MESDC2       |           |        |           |           |        |           |           |
|             | 2639         | GCDH           | 22936  | ELL2          | 51170     | HSD17B11      | 79675            | FASTKD1       | 64902  | AGXT2       | 9908      | G3BP2        | 54482     | CCDC76       | 56624            | ASAH2        |           |        |           |           |        |           |           |
|             | 1389         | CREBL2         | 114088 | TRIM9         | 8881      | CDC16         | 55708            | MIER1         | 55081  | IFT57       | 374291    | NDUF57       | 1207      | CLNS1A       | 25875            | LETMD1       |           |        |           |           |        |           |           |
|             | 23399        | CTDNEP1        | 51678  | MPP6          | 63893     | UBE2O         | 286              | ANK1          | 7917   | BAG6        | 7274      | TTPA         | 2820      | GPD2         | 196394           | AMN1         |           |        |           |           |        |           |           |
|             | 210          | ALAD           | 535    | ATP6V0A1      | 10352     | WARS2         | 90196            | SYS1          | 6473   | SHOX        | 9136      | RRP9         | 84271     | FOLDIP3      | 3008             | HIST1H1E     |           |        |           |           |        |           |           |
|             | 64854        | USP46          | 10398  | MYL9          | 9986      | RCE1          | 4907             | NT5E          | 6557   | SLC12A1     | 5105      | PCK1         | 282890    | ZNF311       | 414149           | ACBD7        |           |        |           |           |        |           |           |
|             | 254359       | ZDHC24         | 55094  | GPATCH1       | 51390     | AIG1          | 8445             | DYRK2         | 7411   | VBP1        | 6943      | TCF21        | 51295     | EC5IT        | 821              | CANX         |           |        |           |           |        |           |           |
|             | 9685         | CLINT1         | 55207  | ARL8B         | 4829      | NMBR          | 122769           | LRR1          | 142678 | MB2         | 8649      | LAMTOR3      | 51517     | NCKIPSD      | 54346            | UNC93A       |           |        |           |           |        |           |           |
|             | 493753       | C2orf64        | 10912  | GADD45G       | 3280      | HES1          | 56922            | MCC1          | 26100  | WPI2        | 55657     | ZNF692       | 115825    | WDFY2        | 83451            | ABHD11       |           |        |           |           |        |           |           |
|             | 1111         | CHEK1          | 55753  | OGDHL         | 9400      | RECL5         | 51639            | AC008073.5    | 79753  | SNIP1       | 3053      | SERPIND1     | 115948    | CCDC151      | 92960            | PEX11G       |           |        |           |           |        |           |           |
|             | 951          | CD37           | 28973  | MRPS18B       | 534       | ATP6V1G2      | 9182             | RASSF9        | 92342  | METTL18     | 206338    | ACO10282.1   | 23179     | RGL1         | 57794            | SURP1        |           |        |           |           |        |           |           |
|             | 5245         | PHB            | 374291 | NDUFS7        | 401409    | RAB19         | 57446            | NDRG3         | 6654   | SOS1        | 6519      | SLC3A1       | 129787    | TMEM18       | 473              | RERE         |           |        |           |           |        |           |           |
|             | 23028        | KDM1A          | 1757   | SARDH         | 142679    | DLSP19        | 1117             | CHI3L2        | 50487  | PLA2G3      | 117584    | RFLP         | 55716     | LMBR1L       | 50861            | STMN3        |           |        |           |           |        |           |           |
|             | 9068         | ANGPTL1        | 156    | ADRBK1        | 51185     | CRBN          | 259232           | NALCN         | 3954   | LETM1       | 79576     | NKAP         | 22980     | TCF25        | 442117           | GALNTL6      |           |        |           |           |        |           |           |
|             | 5563         | PRKAA2         | 79956  | ERMP1         | 0         | AC120498.1    | 1504             | CTRB1         | 7936   | RDBP        | 5439      | POLR2J       | 6051      | RNPEP        | 6873             | TF2          |           |        |           |           |        |           |           |
|             | 51604        | PIGT           | 7274   | TTFA          | 55505     | NOP10         | <b>ADHD 2897</b> | <b>GRIK1</b>  | 11033  | ADAP1       | 54456     | MOV10L1      | 9477      | MED20        | 64747            | MFS1         |           |        |           |           |        |           |           |
|             | 79154        | DHRS11         | 11169  | WDHD1         | 131474    | CHCHD4        | 11047            | ADM1          | 9896   | FIG4        | 84951     | TNS4         | 6181      | RPLP2        | 144699           | FBXL14       |           |        |           |           |        |           |           |
|             | 23092        | ARHGAP26       | 50487  | PLA2G3        | 58490     | RPRD1B        | 84315            | MON1A         | 9442   | MED27       | 1358      | CPA2         | 30820     | KCNIP1       | 2108             | ETFA         |           |        |           |           |        |           |           |
|             | 81932        | HDHD3          | 79147  | FKRP          | 10933     | MORF4L1       | 11197            | WIF1          | 8543   | LMO4        | 51501     | C11orf73     | 29836     | NIPBL        | 387521           | TMEM189      |           |        |           |           |        |           |           |
|             | 9931         | HELZ           | 1585   | CYP11B2       | 113251    | LARP4         | 10092            | ARPC5         | 7841   | MOGS        | 286205    | SCAI         | 54707     | GNP2         | 55174            | INTS10       |           |        |           |           |        |           |           |
|             | 168544       | ZNF467         | 9546   | APBA3         | 84890     | ADO           | 84188            | FAR1          | 2539   | G6PD        | 6426      | SRSF1        | 6120      | RPE          | 9039             | UBA3         |           |        |           |           |        |           |           |
|             | 254956       | MORN5          | 10573  | MRPL28        | 34        | ACADM         | 115024           | NT5C3L        | 10257  | ABCC4       | 64772     | ENGASE       | 55856     | ACOT13       | 60561            | RINT1        |           |        |           |           |        |           |           |
|             | 8317         | CDC7           | 64080  | RBKS          | 79993     | ELOVL7        | 128              | ADH5          | 149041 | RC3H1       | 4647      | MYO7A        | 7307      | U2AF1        | 29767            | TMOD2        |           |        |           |           |        |           |           |
| <b>ADHD</b> | <b>79659</b> | <b>DYNC2H1</b> | 80725  | <b>SRGIN1</b> | 260429    | <b>PRSS33</b> | 55729            | <b>ATF7IP</b> | 81577  | <b>FRS3</b> | 55332     | <b>DRAM1</b> | 84516     | <b>DCTN5</b> | 93099            | <b>DMKN</b>  |           |        |           |           |        |           |           |
|             | 22856        | CHSY1          | 54949  | SDHAF2        | 5631      | PRPS1         | 23074            | UHRF1BP1L     | 83902  | KRTAP17-1   | 441381    | LRRRC24      | 388403    | YPEL2        | 91012            | LASS5        |           |        |           |           |        |           |           |
|             | 1504         | CTRB1          | 64682  | ANAPC1        | 80725     | SRGIN1        | 10437            | IFI30         | 51119  | SBDS        | 285343    | CRCC23       | 7507      | XPA          | 79001            | VKORC2       |           |        |           |           |        |           |           |
|             | 3713         | IVL            | 11021  | RAB35         | 57095     | PITHD1        | 4905             | NSF           | 317781 | DDX51       | 26057     | ANKRD17      | 310       | ANXA7        | 83937            | RASSF4       |           |        |           |           |        |           |           |
|             | 26235        | FBXL4          | 23248  | RPRD2         | 9128      | PRPF4         | 55351            | STK32B        | 84908  | FAM136A     | 1719      | DHFR         | 89978     | ATPB04       | 25804            | LSM4         |           |        |           |           |        |           |           |
|             | 56945        | MRPS22         | 55917  | CTTNBP2NL     | 24137     | KIF4A         | 7186             | TRAF2         | 128240 | APOA1BP     | 95        | ACY1         | 4925      | NUCB2        | 92255            | LMBRD2       |           |        |           |           |        |           |           |
|             | 64080        | RBKS           | 260429 | PRSS33        | 143884    | CWF19L2       | 10200            | MPHOSPH6      | 94233  | OPN4        | 84316     | LSMD1        | 1317      | SLC31A1      | 832              | CAFZB        |           |        |           |           |        |           |           |
|             | 51433        | ANAPC5         | 347404 | LANCL3        | 91304     | C19orf6       | 55781            | RIOK2         | 10474  | TADA3       | 347       | APD2         | 10458     | BAIAP2       | 283385           | MORN3        |           |        |           |           |        |           |           |
|             | 11044        | PAPD7          | 25880  | TMEM186       | 53948     | MRPL16        | 1389             | CREBL2        | 53947  | A4GALT      | 29951     | PDRN4        | 3091      | HIF1A        | <b>ADHD 7905</b> | <b>REPS5</b> |           |        |           |           |        |           |           |
|             | 4668         | NAGA           | 53981  | CPSF2         | 9818      | NUPL1         | 3911             | LAMA5         | 9133   | CCNB2       | 160728    | SLC5A8       | 57696     | DDX55        | 144717           | FAM109A      |           |        |           |           |        |           |           |
|             | 9146         | HGS            | 84334  | C14orf153     | 1357      | CPA1          | 55324            | ABCF3         | 157769 | FAM91A1     | 54606     | DDX56        | 4222      | MEOX1        | 23205            | ACSBG1       |           |        |           |           |        |           |           |
|             | 254552       | NUDT8          | 8646   | CHRD          | 11070     | TMEM115       | 51499            | TRIA1P1       | 8668   | E1F3        | 905       | CCNT2        | 6150      | MRPL23       | 3182             | HNRNPAB      |           |        |           |           |        |           |           |
|             | 51056        | LAP3           | 6345   | SRL           | 9068      | ANGPTL1       | 100137047        | JMJD7         | 23116  | FAM179B     | 116843    | C6orf192     | 8564      | KMO          | 79065            | ATG9A        |           |        |           |           |        |           |           |

| set 17 | Entrez ID | Gene Name | set 18      | Entrez ID   | Gene Name     | set 19 | Entrez ID | Gene Name | set 20      | Entrez ID    | Gene Name   |
|--------|-----------|-----------|-------------|-------------|---------------|--------|-----------|-----------|-------------|--------------|-------------|
|        | 92960     | PEX11G    |             | 2720        | GLB1          |        | 203062    | TSNARE1   |             | 54521        | WDR44       |
|        | 738       | C11orf2   |             | 5111        | PCNA          |        | 27232     | GNMT      |             | 26103        | LRIT1       |
|        | 284129    | SLC26A11  |             | 206358      | SLC36A1       |        | 23519     | ANP32D    |             | 5394         | EXOSC10     |
|        | 57448     | BIRC6     |             | 90007       | MIDN          |        | 471       | ATIC      |             | 90139        | TSPAN18     |
|        | 1175      | AP2S1     |             | 58472       | SQRDL         |        | 286207    | C9orf117  |             | 55651        | NHP2        |
|        | 1993      | ELAVL2    |             | 25904       | CNOT10        |        | 26576     | SRPK3     |             | 26074        | C20orf26    |
|        | 10184     | LHFPL2    |             | 307         | ANXA4         |        | 51167     | CYB5R4    |             | 474354       | LRRC18      |
|        | 63036     | CELA2A    |             | 3996        | LLGL1         |        | 11153     | FICD      |             | 81555        | YIPF5       |
|        | 10042     | HMGXB4    |             | 84334       | C14orf153     |        | 7372      | UMPS      |             | 81888        | HY1         |
|        | 666       | BOK       |             | 9452        | ITM2A         |        | 2799      | GNS       |             | 5001         | ORC5        |
|        | 284451    | ODF3L2    |             | 4659        | PPP1R12A      |        | 1812      | DRD1      |             | 134430       | WDR36       |
|        | 6872      | TAF1      |             | 83450       | LRRC48        |        | 2040      | STOM      |             | 7252         | TSHB        |
|        | 84542     | KIAA1841  |             | 79893       | GGNBP2        |        | 23406     | COTL1     |             | 4086         | SMAD1       |
|        | 6259      | RYK       |             | 5160        | PDHA1         |        | 79087     | ALG12     |             | 51569        | UFM1        |
|        | 6730      | SRP68     | <b>ADHD</b> | <b>8464</b> | <b>SUPT3H</b> |        | 80199     | FUZ       |             | 54939        | COMMD4      |
|        | 8690      | JRKL      |             | 8834        | TMEM11        |        | 6342      | SCP2      |             | 4729         | NDUFV2      |
|        | 27229     | TUBGCP4   |             | 29071       | C1GALT1C1     |        | 23063     | WAPAL     |             | 25920        | COBRA1      |
|        | 4899      | NRF1      |             | 80303       | EFHD1         |        | 3224      | HOXC8     | <b>ADHD</b> | <b>55084</b> | <b>SOBP</b> |
|        | 10951     | CBX1      |             | 84545       | MRPL43        |        | 4436      | MSH2      |             | 54932        | EXD3        |
|        | 4537      | MT-ND3    |             | 284723      | SLC25A34      |        | 9917      | FAM20B    |             | 27075        | TSPAN13     |
|        | 442117    | GALNTL6   |             | 285440      | CYP4V2        |        | 2530      | FUT8      |             | 5524         | PPP2R4      |
|        | 9070      | ASH2L     |             | 1802        | DPH2          |        | 51365     | PLA1A     |             | 5905         | RANGAP1     |
|        | 53635     | PTOV1     |             | 56986       | DTWD1         |        | 5287      | PIK3C2B   |             | 6183         | MRRS12      |
|        | 23091     | ZC3H13    |             | 51028       | VPS36         |        | 5714      | PSMD8     |             | 93436        | ARMC6       |
|        | 9493      | KIF23     |             | 284098      | PIGW          |        | 5909      | RAP1GAP   |             | 10586        | MAB2L2      |
|        | 37        | ACADV1    |             | 112479      | ER12          |        | 93624     | TADA2B    |             | 79064        | TMEM223     |
|        | 23412     | COMMD3    |             | 9238        | TBRG4         |        | 8898      | MTMR2     |             | 92558        | CCDC64      |
|        | 29079     | MED4      |             | 206358      | SLC36A1       |        | 9046      | DOK2      |             | 8879         | SGPL1       |
|        | 25841     | ABTB2     |             | 117283      | IP6K3         |        | 2677      | GGCX      |             | 7386         | UQCRRS1     |
|        | 284723    | SLC25A34  |             | 92399       | MRRF          |        | 118426    | LOH12CR1  |             | 3795         | KHK         |
|        | 771       | CA12      |             | 10857       | PGRMC1        |        | 129880    | BBS5      |             | 57045        | TWSG1       |
|        | 1305      | COL13A1   |             | 2932        | GSK3B         |        | 151651    | EFHB      |             | 23480        | SEC61G      |
|        | 3248      | HPGD      |             | 4857        | NOVA1         |        | 3008      | HIST1H1E  |             | 26088        | GGA1        |
|        | 55272     | IMP3      |             | 84188       | FAR1          |        | 57020     | C16orf62  |             | 1607         | DGKB        |
|        | 64422     | ATG3      |             | 4841        | NONO          |        | 22876     | INPP5F    |             | 22895        | RPH3A       |
|        | 10885     | WDR3      |             | 8226        | HDHD1         |        | 6210      | RPS15A    |             | 55388        | MCM10       |
|        | 84273     | C4orf14   |             | 545         | ATR           |        | 4125      | MAN2B1    |             | 6121         | RPE65       |
|        | 10257     | ABCC4     |             | 91445       | RNF185        |        | 64783     | RBM15     |             | 83786        | FRMD8       |
|        | 80145     | THOC7     |             | 5498        | PPOX          |        | 202559    | KHDRBS2   |             | 11171        | STRAP       |
|        | 9400      | RECQL5    |             | 54997       | TESC          |        | 949       | SCARB1    |             | 8694         | DGAT1       |
|        | 387338    | NSUN4     |             | 3778        | KCNMA1        |        | 5170      | PDPK1     |             | 840          | CASP7       |
|        | 6950      | TCP1      |             | 8566        | PDXK          |        | 58259     | CTNBL1    |             | 80725        | SRCIN1      |
|        | 51365     | PLA1A     |             | 51528       | JKAMP         |        | 202018    | TAPT1     |             | 9328         | GTF3C5      |
|        | 124491    | TMEM170A  |             | 25886       | POC1A         |        | 5083      | PAX9      |             | 55972        | SLC25A40    |
|        | 56886     | UGGT1     |             | 6256        | RXRA          |        | 55503     | TRPV6     |             | 25979        | DHRS7B      |
|        | 10072     | DPP3      |             | 56940       | DUSP22        |        | 6522      | SLC4A2    |             | 9277         | WDR46       |
|        | 54903     | MKS1      |             | 4351        | MPI           |        | 340156    | MYLK4     |             | 21           | ABCA3       |
|        | 23647     | ARFIP2    |             | 389207      | GRXCR1        |        | 54516     | MTRF1L    |             | 254170       | FBXO33      |
|        | 6581      | SLC22A3   |             | 3796        | KIF2A         |        | 10399     | GNB2L1    |             | 54796        | BNC2        |
|        | 9213      | XPR1      |             | 54980       | C2orf42       |        | 64750     | SMURF2    |             | 25796        | PGLS        |
|        | 54915     | YTHDF1    |             | 8266        | UBL4A         |        | 4695      | NDUFA2    |             | 91647        | ATPAF2      |
|        | 51552     | RAB14     |             | 6829        | SUPT5H        |        | 114826    | SMYD4     |             | 84145        | ZFYVE20     |
|        | 55088     | C10orf118 |             | 79863       | RBFA          |        | 115265    | DDIT4L    |             | 5184         | PEPD        |
|        | 4668      | NAGA      |             | 1410        | CRYAB         |        | 8611      | PPAP2A    |             | 648          | BMI1        |
|        | 653437    | AQP12B    |             | 8533        | COPS3         |        | 64768     | IPPK      |             | 5425         | POLD2       |
|        | 51650     | MRPS33    |             | 5322        | PLA2G5        |        | 26960     | NBEA      |             | 3991         | LIPE        |
|        | 200081    | TXLNA     |             | 642         | BLMH          |        | 27095     | TRAPPC3   |             | 57476        | GRAMD1B     |
|        | 22987     | SV2C      |             | 23241       | PACS2         |        | 23054     | NCOA6     |             | 867          | CBL         |
|        | 51009     | DERL2     |             | 51763       | INPP5K        |        | 442117    | GALNTL6   |             | 5780         | PTPN9       |
|        | 728294    | D2HGDH    |             | 51390       | AIG1          |        | 65080     | MRPL44    |             | 80856        | KIAA1715    |
|        | 26747     | NUFIP1    |             | 29843       | SENP1         |        | 57122     | NUP107    |             | 124936       | CYB5D2      |
|        | 10409     | BASP1     |             | 6582        | SLC22A2       |        | 143884    | CWF19L2   |             | 113251       | LARP4       |
|        | 22794     | CASC3     |             | 4069        | LYZ           |        | 6147      | RPL23A    |             | 6610         | SMPD2       |
|        | 51495     | PTPLAD1   |             | 92609       | TIMMSO        |        | 835       | CASP2     |             | 1783         | DYNC1L12    |
|        | 55082     | ARGLU1    |             | 54729       | NKX1-1        |        | 23335     | WDR7      |             | 2899         | GRIK3       |
|        | 6209      | RPS15     |             | 51660       | BRP44L        |        | 79794     | C12orf49  |             | 836          | CASP3       |
|        | 147912    | SIX5      |             | 729991      | MEF2BNB       |        | 84826     | SFT2D3    |             | 84900        | RNFT2       |
|        | 4873      | NAP1L1    |             | 5430        | AMAC1L3       |        | 1933      | EEF1B2    |             | 1665         | DHX15       |
|        | 51642     | MRPL48    |             | 84191       | FAM96A        |        | 284129    | SLC26A11  |             | 83440        | ADPGK       |
