# Supplementary material for: ADHD-associated dopamine transporter, latrophilin and neurofibromin share a dopamine-related locomotor signature in Drosophila
Source: PubMed Central journal article supplement — Mol Psychiatry. 2015 May 12;21(4):565–73. doi: 10.1038/mp.2015.55 (PMC4804182; doi:10.1038/mp.2015.55), 2015-05-12
Supplement: mp201555x8.pdf [file mp201555x8.pdf]

**Supplementary Table 4. Absolute activity and sleep values**

| Gene                          | Relative day (RD) |             |        | Relative night (RN) |            |       |
|-------------------------------|-------------------|-------------|--------|---------------------|------------|-------|
|                               | Control           | RNAi        | P      | Control             | RNAi       | P     |
| <b>Activity</b><br><i>DAT</i> | 32.2 ± 8.78       | 54.0 ± 13.6 | 0.009  | 94.3 ± 27.9         | 306 ± 69.6 | 4E-07 |
| <i>Latrophilin</i>            | 18.6 ± 8.34       | 37.5 ± 13.3 | 0.02   | 78.2 ± 30.5         | 184 ± 61.2 | 0.003 |
| <i>Nf1</i>                    | 43.3 ± 15.3       | 66.4 ± 31.5 | 0.2    | 69.2 ± 21.9         | 305 ± 99.4 | 5E-05 |
| <b>Sleep</b><br><i>DAT</i>    | 391 ± 8.92        | 360 ± 12.8  | 0.0002 | 349 ± 15.6          | 248 ± 23.3 | 2E-10 |
| <i>Latrophilin</i>            | 400 ± 7.2         | 374 ± 11.9  | 0.0006 | 362 ± 18.6          | 287 ± 25.5 | 1E-05 |
| <i>Nf1</i>                    | 388 ± 10.8        | 364 ± 21.6  | 0.06   | 368 ± 14.3          | 250 ± 40.1 | 2E-06 |

Error is 95% CI
