# Supplementary material for: ADHD-associated dopamine transporter, latrophilin and neurofibromin share a dopamine-related locomotor signature in Drosophila
Source: PubMed Central journal article supplement — Mol Psychiatry. 2015 May 12;21(4):565–73. doi: 10.1038/mp.2015.55 (PMC4804182; doi:10.1038/mp.2015.55), 2015-05-12
Supplement: mp201555x9.pdf [file mp201555x9.pdf]

**Supplementary Table 5. EMBOSS Needle Protein Alignment**

| <b>Human <i>Drosophila</i></b> | <b>identity (%)</b> | <b>similarity (%)</b> | <b>gap (%)</b> |
|--------------------------------|---------------------|-----------------------|----------------|
| <i>FLCN cher</i>               | 45.0                | 59.1                  | 13.3           |
| <i>IL16 bbg</i>                | 18.5                | 30.2                  | 42.6           |
| <i>KCNC1 Shaw</i>              | 43.1                | 57.2                  | 17.8           |
| <i>PRKG1 for</i>               | 41.1                | 52.5                  | 30.8           |
| <i>SLC6A3 DAT</i>              | 46.5                | 62.3                  | 14.1           |
| <i>LPHN3 Cirl</i>              | 17.8                | 29.0                  | 42.3           |
| <i>NF1 Nf1</i>                 | 54.1                | 68.2                  | 11.2           |
