# Supplementary figures and images for: ADHD-associated dopamine transporter, latrophilin and neurofibromin share a dopamine-related locomotor signature in Drosophila
Source: PubMed Central journal article supplement — Mol Psychiatry. 2015 May 12;21(4):565–73. doi: 10.1038/mp.2015.55 (PMC4804182; doi:10.1038/mp.2015.55), 2015-05-12

# Supplementary Figure 1

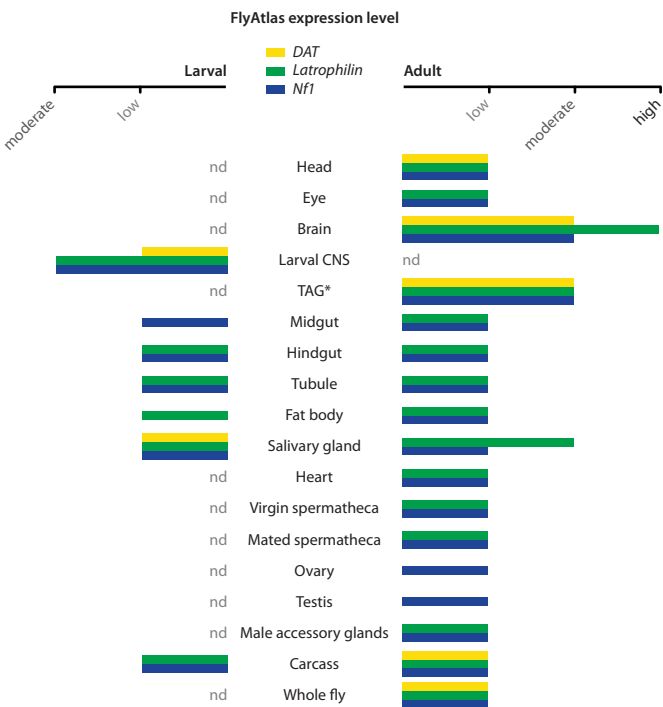

\*Thoracoabdominal ganglion

Supplement: mp201555x3.pdf [file mp201555x3.pdf]
